# Supplementary material
Source: PubMed Central journal article supplement (PMC2526707)
Supplement: E08-05-0467_1.pdf [file E08-05-0467_1.pdf]

**Supplementary Table 1. Primers used in this study.**

| Name          | Sequence 5'→3'                                                              |
|---------------|-----------------------------------------------------------------------------|
| LmSTT3A_for   | AACACCAGAACTTAGTTTCGACGGATTCTAGAACTAGTGGATCCCCCGG<br>GATGCCGGCCAAGAACCAGCA  |
| LmSTT3A/B_rev | TCAGGAACATCGTATGGGTACGCCTTGTGGTGCGTCTCCT                                    |
| LmSTT3A/B_HA  | TCGATCAGATGGACAAGCACAAGCAGCACAAGGAGACGCACCACAAGG<br>CGTACCCATACGATGTTCTCTGA |
| LmSTT3B_for   | AACACCAGAACTTAGTTTCGACGGATTCTAGAACTAGTGGATCCCCCGG<br>GATGCTGCTCTTGTTCCTCTC  |
| LmSTT3C_for   | AACACCAGAACTTAGTTTCGACGGATTCTAGAACTAGTGGATCCCCCGG<br>GATGCCCTCGCAAACCTCGTAG |
| LmSTT3C_rev   | TCAGGAACATCGTATGGGTAGCGCCTGCTCCCGCTCCAAG                                    |
| LmSTT3C_HA    | ACTTCAAGGACCTTCTTGATCCCAGAACGACTTGGAGCGGGAGCAGGCG<br>CTACCCATACGATGTTCTCTGA |
| LmSTT3D_for   | AACACCAGAACTTAGTTTCGACGGATTCTAGAACTAGTGGATCCCCCGG<br>GATGGGCAAGCGGAAGGGAAA  |
| LmSTT3D_rev   | TCAGGAACATCGTATGGGTACCGTCGGTCTCTCGCTTTCAC                                   |
| LmSTT3D_HA    | CGTACCAGGAGGAGTACATGCGCCGGATGCGTGAAAGCGAGAACCGAC<br>GGTACCCATACGATGTTCTCTGA |
| CYC1_HA       | GCGTGACATAACTAATTACATGACTCGAGGTCGACGGTATCGATAAGCT<br>TGCACTGAGCAGCGTAATCTG  |

**Supplementary Table 2. Yeast strains used in this study.**

| Strain | Genotype                                                                                             | Reference                            |
|--------|------------------------------------------------------------------------------------------------------|--------------------------------------|
| YG543  | <i>MATa ade2 leu2 ura3 his3 lys2 stt3-7</i>                                                          | (Spirig <i>et al.</i> , 1997)        |
| SS328  | <i>MATα ade2-101 his3D200 lys2-801 ura3-52</i>                                                       | (Vijayraghavan <i>et al.</i> , 1989) |
| BY4741 | <i>MATa his3delta1 leu2delta0 met15delta0 ura3delta0</i>                                             | Euroscarf                            |
| BY4742 | <i>MATα his3delta1 leu2delta0 met15delta0 ura3delta0</i>                                             | Euroscarf                            |
| Y03108 | <i>MATa his3Δ1 leu2Δ0 met15Δ0 ura3Δ0 ALG3::kanMX4</i>                                                | Euroscarf                            |
| Y01993 | <i>MATa his3Δ1 leu2Δ0 met15Δ0 ura3Δ0 ALG9::kanMX4</i>                                                | Euroscarf                            |
| Y05405 | <i>MATa his3Δ1 leu2Δ0 met15Δ0 ura3Δ0 ALG12::kanMX4</i>                                               | Euroscarf                            |
| Y24390 | <i>MAT a/α his3Δ1/his3Δ1 leu2Δ0/leu2Δ0 lys2Δ0/LYS2 MET15/met15Δ0 ura3Δ0/ura3Δ0 STT3::kanMX4/STT3</i> | Euroscarf                            |
| YBS10  | <i>MATα his3Δ1 leu2Δ0 lys2Δ0 met15Δ0 ura3Δ0 STT3::kanMX4 pSTT3</i>                                   | this study                           |
| YBS11  | <i>MAT a his3Δ1 leu2Δ0 lys2Δ0 met15Δ0 ura3Δ0 STT3::kanMX4 pSTT3</i>                                  | this study                           |
| Y20242 | <i>MAT a/α his3Δ1/his3Δ1 leu2Δ0/leu2Δ0 lys2Δ0/LYS2 MET15/met15Δ0 ura3Δ0/ura3Δ0 WBP1::kanMX4/WBP1</i> | Euroscarf                            |
| Y26770 | <i>MAT a/α his3Δ1/his3Δ1 leu2Δ0/leu2Δ0 lys2Δ0/LYS2 MET15/met15Δ0 ura3Δ0/ura3Δ0 OST1::kanMX4/OST1</i> | Euroscarf                            |
| Y22359 | <i>MAT a/α his3Δ1/his3Δ1 leu2Δ0/leu2Δ0 lys2Δ0/LYS2 MET15/met15Δ0 ura3Δ0/ura3Δ0 OST2::kanMX4/OST2</i> | Euroscarf                            |
| Y20730 | <i>MAT a/α his3Δ1/his3Δ1 leu2Δ0/leu2Δ0 lys2Δ0/LYS2 MET15/met15Δ0 ura3Δ0/ura3Δ0 SWP1::kanMX4/SWP1</i> | Euroscarf                            |
| YG2052 | <i>MAT a his3Δ1 leu2Δ0 ura3Δ0 STT3::kanMX4 pLmSTT3A</i>                                              | this study                           |
| YG2054 | <i>MAT a his3Δ1 leu2Δ0 ura3Δ0 STT3::kanMX4 pLmSTT3B</i>                                              | this study                           |
| YG2057 | <i>MATα his3Δ1 leu2Δ0 ura3Δ0 STT3::kanMX4 pLmSTT3D</i>                                               | this study                           |
| YG2058 | <i>MATa his3Δ1 leu2Δ0 ura3Δ0 STT3::kanMX4 pLmSTT3D</i>                                               | this study                           |
| YG2072 | <i>MATα his3Δ1 leu2Δ0 ura3Δ0 WBP1::kanMX4 pLmSTT3D</i>                                               | this study                           |
| YG2073 | <i>MATα his3Δ1 leu2Δ0 ura3Δ0 OST1::kanMX4 pLmSTT3D</i>                                               | this study                           |
| YG2075 | <i>MATα his3Δ1 leu2Δ0 ura3Δ0 OST2::kanMX4 pLmSTT3D</i>                                               | this study                           |
| YG2080 | <i>MATα his3Δ1 leu2Δ0 ura3Δ0 SWP1::kanMX4 pLmSTT3D</i>                                               | this study                           |
| YG2082 | <i>MATa his3Δ1 leu2Δ0 ura3Δ0 STT3::kanMX4 ALG12::kanMX4 pLmSTT3D</i>                                 | this study                           |
| YG2084 | <i>MATα his3Δ1 leu2Δ0 ura3Δ0 STT3::kanMX4 WBP1::kanMX4 pLmSTT3D</i>                                  | this study                           |
| YG2099 | <i>MATa his3Δ1 leu2Δ0 ura3Δ0 OST1::kanMX4 OST2::kanMX4 pLmSTT3D</i>                                  | this study                           |

**Supplementary Table 3. Peptides containing N-glycosylation sequons identified by mass spectrometry.**

| Glycosylation site | Observed (m/z) | Observed (Da) | Predicted (Da) | $\Delta$ mass (Da) | Score | Expect   | Rank | Sequence                                        |
|--------------------|----------------|---------------|----------------|--------------------|-------|----------|------|-------------------------------------------------|
| ECM33_57*          | 976.9972       | 1951.9798     | 1951.9772      | 0.0025             | 38    | 0.047    | 1    | L.DKISGCSTIVGNLTIT<br>G.D                       |
| ECM33_83*          | 1064.5200      | 3190.5382     | 3190.5405      | -0.0023            | 50    | 0.0031   | 1    | G.DLGSAALASIQEIDG<br>SLTIFNSSSLSSFSA.D          |
| EXG2_50*           | 848.4091       | 1694.8036     | 1694.8039      | -0.0004            | 44    | 0.01     | 1    | K.FASYANDTITVK.G                                |
| GAS1_149**         | 1404.3256      | 4209.9550     | 4209.9543      | 0.0007             | 70    | 2.00E-05 | 1    | K.TVVDTFANYTNVLG<br>FFAGNEVTNNYTNTD<br>ASAFVK.A |
| GAS3_269*          | 578.7707       | 1155.5268     | 1155.5295      | -0.0028            | 30    | 0.018    | 1    | Y.DKLNSTFE.D                                    |
| PLB2_47*           | 848.4067       | 1694.7988     | 1694.7999      | -0.0011            | 72    | 1.60E-05 | 1    | R.NASGLSTAETDWLK.<br>K                          |
| PLB2_193*          | 962.4853       | 1922.9561     | 1922.9585      | -0.0024            | 65    | 8.8e-05  | 1    | K.SIVNPGGSNLTYTIE<br>R.W                        |
| PRY3_101*          | 884.4063       | 2650.1971     | 2650.1976      | -0.0005            | 55    | 0.00058  | 1    | K.YNYSNPGFSESTGHF<br>TQVVK.S                    |
| SAG1_248*          | 723.3017       | 1444.5889     | 1444.5936      | -0.0047            | 49    | 0.00087  | 1    | N.DWWFPQSYN.D                                   |
| SAG1_79*           | 1135.5703      | 2269.1260     | 2269.1325      | -0.0065            | 104   | 9.60E-09 | 1    | K.LLNSSQTATISLADG<br>TEAFK.C                    |
| SAG1_79            | 1034.0333      | 2066.0520     | 2066.0531      | -0.0011            | 133   | 1.20E-11 | 1    | K.LLNSSQTATISLADG<br>TEAFK.C                    |
| YJR1_99            | 918.4402       | 1834.8658     | 1834.8639      | 0.0020             | 89    | 2.9e-07  | 1    | K.QFAFYTSPGFTVNNS<br>R.S                        |

\* GlcNAc-modified asparagine. All methionines are oxidized and all cysteines are alkylated. Peptides previously identified (Schulz *et al*, manuscript submitted) are not detailed.

**Supplementary Table 4. Relative glycosylation site occupancy in different yeast strains.**

| Peptides  | WT+vec.   | $\Delta stt3$ +D | $\Delta wbp1$ +D | $\Delta ost1$ +D | $\Delta ost1\Delta ost2$ +D | $\Delta stt3\Delta wbp1$ +D* | $\Delta ost2$ +D* | $\Delta swp1$ +D* |
|-----------|-----------|------------------|------------------|------------------|-----------------------------|------------------------------|-------------------|-------------------|
| CRH2_28   | 1.00±0.00 | 1.00±0.00        | 1.00±0.00        | 1.00±0.00        | 1.00±0.00                   | 1.00                         | 1.00              | 1.00              |
| CRH2_96   | 1.00±0.00 | 0.99±0.02        | 0.94±0.08        | 1.00±0.00        | 1.00±0.00                   | 1.00                         | 1.00              | 1.00              |
| CRH2_233  | 1.00±0.00 | 0.96±0.04        | 0.95±0.04        | 0.94±0.06        | 0.98±0.03                   | 0.98                         | 1.00              | 1.00              |
| CRH2_310  | 1.00±0.00 | 1.00±0.00        | 1.00±0.00        | 1.00±0.00        | 1.00±0.00                   | 1.00                         | 1.00              | 1.00              |
| ECM33_83  | 1.00±0.00 | 1.00±0.00        | 1.00±0.00        | 1.00±0.00        | 1.00±0.00                   | 1.00                         | 1.00              | 1.00              |
| ECM33_197 | 1.00±0.00 | 0.70±0.01        | 0.56±0.15        | 0.60±0.02        | 0.60±0.03                   | 0.64                         | 0.67              | 0.47              |
| ECM33_210 | 1.00±0.00 | 0.96±0.02        | 0.94±0.04        | 0.99±0.02        | 0.97±0.01                   | 0.99                         | 0.97              | 0.97              |
| ECM33_268 | 1.00±0.00 | 1.00±0.00        | 1.00±0.00        | 1.00±0.00        | 1.00±0.00                   | 1.00                         | 1.00              | 1.00              |
| ECM33_329 | 1.00±0.00 | 0.67±0.06        | 0.60±0.13        | 0.76±0.01        | 0.75±0.02                   | 0.68                         | 0.73              | 0.74              |
| GAS1_40   | 1.00±0.00 | 0.98±0.02        | 0.97±0.02        | 0.95±0.02        | 0.94±0.02                   | 0.95                         | 1.00              | 1.00              |
| GAS1_57   | 1.00±0.00 | 0.97±0.03        | 0.97±0.06        | 0.98±0.02        | 1.00±0.00                   | 0.86                         | 1.00              | 1.00              |
| GAS1_95   | 1.00±0.00 | 1.00±0.00        | 1.00±0.01        | 1.00±0.00        | 1.00±0.00                   | 1.00                         | 1.00              | 1.00              |
| GAS1_149  | 1.00±0.00 | 1.00±0.00        | 1.00±0.00        | 1.00±0.00        | 1.00±0.00                   | 0.97                         | 1.00              | 1.00              |
| GAS1_253  | 0.99±0.01 | 1.00±0.00        | 1.00±0.00        | 1.00±0.00        | 1.00±0.00                   | 1.00                         | 1.00              | 1.00              |
| GAS3_201  | 1.00±0.00 | 1.00±0.00        | 1.00±0.00        | 1.00±0.00        | 1.00±0.00                   | 1.00                         | 1.00              | 1.00              |
| GAS3_269  | 1.00±0.00 | 1.00±0.00        | 1.00±0.00        | 0.99±0.02        | 1.00±0.00                   | 1.00                         | 1.00              | 1.00              |
| GAS3_350  | 1.00±0.00 | 1.00±0.00        | 1.00±0.00        | 1.00±0.00        | 1.00±0.00                   | 1.00                         | 1.00              | 1.00              |
| GAS5_24   | 1.00±0.00 | 1.00±0.00        | 0.99±0.01        | 1.00±0.00        | 0.99±0.01                   | 1.00                         | 0.97              | 0.99              |
| GAS5_60   | 1.00±0.00 | 1.00±0.00        | 1.00±0.00        | 1.00±0.00        | 1.00±0.00                   | 1.00                         | 1.00              | 1.00              |
| GAS5_344  | 1.00±0.00 | 1.00±0.00        | 1.00±0.00        | 1.00±0.00        | 1.00±0.00                   | 1.00                         | 1.00              | 1.00              |
| SAG1_79   | 0.72±0.04 | 1.00±0.00        | 0.00±0.00        | 1.00±0.00        | 1.00±0.00                   | 0.99                         | 0.98              | 1.00              |
| SAG1_248  | 1.00±0.00 | 1.00±0.00        | 0.99±0.01        | 1.00±0.00        | 1.00±0.00                   | 1.00                         | 1.00              | 1.00              |
| CRH1_177  | 1.00±0.00 | 1.00±0.00        | 0.98±0.03        | 0.98±0.03        | 1.00±0.00                   | 1.00                         | 0.96              | 0.97              |
| PLB2_47   | 1.00±0.00 | 1.00±0.00        | 1.00±0.00        | 1.00±0.00        | 1.00±0.00                   | 1.00                         | 1.00              | 1.00              |
| PRY3_101  | 1.00±0.00 | 1.00±0.00        | 1.00±0.00        | 1.00±0.00        | 1.00±0.00                   | 1.00                         | 1.00              | 1.00              |
| CCW14_87  | 0.00±0.00 | 0.00±0.00        | 0.00±0.00        | 0.00±0.00        | 0.00±0.00                   | 0.00                         | 0.00              | 0.00              |
| CWP1_45   | 0.00±0.00 | 0.00±0.00        | 0.00±0.00        | 0.00±0.00        | 0.00±0.00                   | 0.00                         | 0.00              | 0.00              |
| TOS1_417  | 0.00±0.00 | 0.00±0.00        | 0.00±0.00        | 0.00±0.00        | 0.00±0.00                   | 0.00                         | 0.00              | 0.00              |

The relative occupancy of a site given at the left is shown for wild-type strain (BY4742) with empty vector, and strains expressing LmSTT3D:  $\Delta stt3$  (YG2057),  $\Delta wbp1$  (YG2072),  $\Delta ost1$  (YG2073),  $\Delta ost1\Delta ost2$  (YG2099),  $\Delta stt3\Delta wbp1$  (YG2084),  $\Delta ost2$  (YG2075), and  $\Delta swp1$  (YG2080). Values are given for the sites indicated and represent the mean of three independent measurements.\* Single measurement.

Spirig, U., Glavas, M., Bodmer, D., Reiss, G., Burda, P., Lippuner, V., te Heesen, S., and Aebi, M. (1997). The STT3 protein is a component of the yeast oligosaccharyltransferase complex. *Mol. Gen. Genet.* 256, 628-637.

Vijayraghavan, U., Company, M., and Abelson, J. (1989). Isolation and characterization of pre-mRNA splicing mutants of *Saccharomyces cerevisiae*. *Genes Dev* 3, 1206-1216.
